# Supplementary material for: Age- and Sex-Specific Reference Values for Renal Volume and Association with Risk Factors for Chronic Kidney Disease in a General Population—An MRI-Based Study
Source: MDPI journal article supplement (doi:10.3390/jcm13030769), 2024-01-29
Supplement: s1 [file s1]

**Supplemental Table S1.** Median renal parenchyma volume with lower reference values (5<sup>th</sup> percentile) in women and men according to CKD stages G1-3 (N=1813). In our general population sample, there were only 2 persons in CKD G4-5.

|                            | eGFR<br>(ml/min per<br>1.73m <sup>2</sup> ) | Women                                            |                    | Men                                              |                    |
|----------------------------|---------------------------------------------|--------------------------------------------------|--------------------|--------------------------------------------------|--------------------|
|                            |                                             | Median (25 <sup>th</sup> ,<br>75 <sup>th</sup> ) | Reference<br>value | Median (25 <sup>th</sup> ,<br>75 <sup>th</sup> ) | Reference<br>value |
|                            |                                             | (5 <sup>th</sup> percentile)                     |                    | (5 <sup>th</sup> percentile)                     |                    |
| Right kidney<br>volume     |                                             | 138 (121;157)                                    | 99                 | 174 (154;197)                                    | 126                |
|                            | ≥90                                         | 146 (131;164)                                    | 105                | 181 (162;208)                                    | 142                |
|                            | 60 – 89                                     | 134 (118;152)                                    | 99                 | 166 (148;188)                                    | 124                |
|                            | 30 – 59                                     | 117 (100;131)                                    | 85                 | 168 (118;194)                                    | 110                |
|                            | p-value                                     | <0.001                                           |                    | <0.001                                           |                    |
| Left kidney<br>volume      |                                             | 144 (125;165)                                    | 102                | 180 (160;203)                                    | 132                |
|                            | ≥90                                         | 151 (135;172)                                    | 114                | 190 (167;215)                                    | 143                |
|                            | 60 – 89                                     | 141 (122;162)                                    | 101                | 173 (154;195)                                    | 129                |
|                            | 30 – 59                                     | 122 (110;138)                                    | 82                 | 152 (112;187)                                    | 93                 |
|                            | p-value                                     | <0.001                                           |                    | <0.001                                           |                    |
| Right kidney<br>volume/BSA |                                             | 77.4 (68.8;86.4)                                 | 57.3               | 84.6 (77.0;93.9)                                 | 65.4               |
|                            | ≥90                                         | 83.0 (74.0;90.8)                                 | 62.9               | 89.0 (81.7;99.1)                                 | 72.3               |
|                            | 60 – 89                                     | 75.5 (67.4;83.3)                                 | 56.9               | 80.4 (73.7;90.1)                                 | 64.2               |
|                            | 30 – 59                                     | 63.3 (56.5;70.3)                                 | 45.5               | 79.6 (61.7;88.6)                                 | 57.2               |
|                            | p-value                                     | <0.001                                           |                    | <0.001                                           |                    |
| Left kidney<br>volume/BSA  |                                             | 80.2 (71.6;90.3)                                 | 59.6               | 87.7 (78.9;97.6)                                 | 67.7               |
|                            | ≥90                                         | 85.5 (76.5;95.6)                                 | 65.4               | 92.7 (83.3;103.3)                                | 73.2               |
|                            | 60 – 89                                     | 78.4 (70.4;88.4)                                 | 59.4               | 84.4 (76.6;92.3)                                 | 67.1               |
|                            | 30 – 59                                     | 67.4 (59.1;73.3)                                 | 47.1               | 74.8 (55.7;88.6)                                 | 53.9               |
|                            | p-value                                     | <0.001                                           |                    | <0.001                                           |                    |

p-values are from Kruskal Wallis test for differences of kidney parameters among age groups

**Supplementary Table S2.** Association between risk factors and kidney volume including urinary albumin-to-creatinine ratio (uACR) (n=1260).

| Risk factor                                | Right kidney         |         | Left kidney          |         |
|--------------------------------------------|----------------------|---------|----------------------|---------|
|                                            | volume               |         | volume               |         |
|                                            | $\beta$ (95%CI)      | p-value | $\beta$ (95%CI)      | p-value |
| Men                                        | 8.95 (5.11; 12.79)   | <0.001  | 9.90 (5.71; 14.08)   | <0.001  |
| Age                                        | 0.01 (-0.10; 0.13)   | 0.842   | -0.15 (-0.28; -0.03) | 0.017   |
| Smoking status                             |                      |         |                      |         |
| Never smoker                               | Ref                  |         | Ref                  |         |
| Ex-smoker                                  | 2.71 (-0.33; 5.75)   | 0.081   | 3.39 (0.08; 6.71)    | 0.045   |
| Current smoker                             | 13.9 (10.4; 17.5)    | <0.001  | 15.0 (11.1; 18.8)    | <0.001  |
| Body surface area                          | 97.7 (88.6; 106.7)   | <0.001  | 99.6 (89.7; 109.4)   | <0.001  |
| Systolic BP                                | 0.03 (-0.08; 0.15)   | 0.588   | 0.02 (-0.10; 0.15)   | 0.708   |
| Diastolic BP                               | 0.12 (-0.07; 0.31)   | 0.227   | 0.16 (-0.05; 0.37)   | 0.125   |
| Diabetes mellitus (Typ-2)                  | 4.35 (-0.58; 9.28)   | 0.084   | 2.77 (-2.61; 8.15)   | 0.313   |
| HDL-C                                      | -5.53 (-9.7; -1.35)  | 0.009   | -3.26 (-7.8; 1.29)   | 0.161   |
| LDL-C                                      | 0.11 (-1.32; 1.54)   | 0.878   | -0.23 (-1.78; 1.33)  | 0.773   |
| Glomerular filtration rate                 | 0.56 (0.47; 0.65)    | <0.001  | 0.48 (0.39; 0.58)    | <0.001  |
| Uric acid                                  | -0.03 (-0.05; -0.01) | 0.01    | -0.04 (-0.06; -0.01) | 0.002   |
| Urinary albumin-to-creatinine-ratio (uACR) | 0.01 (0.00; 0.02)    | 0.206   | 0.00 (-0.01; 0.01)   | 0.937   |

$\beta$ -coefficients are from linear regression

**Supplemental Table S3.** Characteristics of the study sample according to CKD stages G1-3 (SHIP-TREND; n=1,813). In our general population sample, there were only 2 persons with CKD G4-5.

| Parameter                            | eGFR (ml/min per 1.73m <sup>2</sup> ) |                   |                   | p-value* |
|--------------------------------------|---------------------------------------|-------------------|-------------------|----------|
|                                      | CKD G1<br>n=754                       | CKD G2<br>n=990   | CKD G3<br>n=69    |          |
| Women                                | 348 (46.1%)                           | 526 (53.1%)       | 54 (78.3%)        | 0.001    |
| Age (years)                          | 45 (36; 55)                           | 55 (45; 65)       | 69 (64; 74)       | <0.001   |
| Smoking status                       |                                       |                   |                   | <0.001   |
| Never-smoker                         | 249 (33.2%)                           | 425 (43%)         | 32 (46.4%)        |          |
| Ex-smoker                            | 274 (36.5%)                           | 372 (37.6%)       | 31 (44.9%)        |          |
| Current smoker                       | 228 (30.4%)                           | 192 (19.4%)       | 6 (8.7%)          |          |
| Body mass index (kg/m <sup>2</sup> ) | 26.5 (23.7; 29.9)                     | 27.8 (24.8; 30.8) | 30.1 (26.6; 33.6) | <0.001   |
| Body surface area (m <sup>2</sup> )  | 1.93 (1.77; 2.06)                     | 1.91 (1.76; 2.07) | 1.87 (1.74; 2.05) | 0.367    |
| Systolic BP (mmHg)                   | 125 (113; 137)                        | 127 (116; 138)    | 134 (124; 147)    | <0.001   |
| Diastolic BP (mmHg)                  | 77 (71; 84)                           | 77 (71; 84)       | 78 (72; 82)       | 0.991    |
| Hypertension                         | 260 (34.6%)                           | 467 (47.3%)       | 56 (81.2%)        | <0.001   |
| Diabetes mellitus (Typ-2)            | 27 (3.6%)                             | 82 (8.3%)         | 22 (31.9%)        | <0.001   |
| HbA1c (%)                            | 5.2 (4.8; 5.5)                        | 5.3 (4.9; 5.6)    | 5.7 (5.4; 6)      | <0.001   |
| HDL-C (mmol/l)                       | 1.43 (1.20; 1.70)                     | 1.4 (1.17; 1.69)  | 1.36 (1.09; 1.73) | 0.236    |
| LDL-C (mmol/l)                       | 3.31 (2.68; 3.96)                     | 3.43 (2.86; 4.03) | 3.38 (2.61; 4.21) | 0.047    |
| Uric acid (mmol/l)                   | 270 (219; 319)                        | 280 (233; 336)    | 347 (299; 406)    | <0.001   |
| Albumin i.U. (mg/l)                  | 8.0 (5.7; 13)                         | 8.9 (6; 15.2)     | 10 (5.7; 19.3)    | 0.010    |
| Right Parenchyma volume (ml)         | 165 (143; 187)                        | 149 (128; 172)    | 119 (107; 140)    | <0.001   |
| Left Parenchyma volume (ml)          | 170 (148; 198)                        | 156 (134; 180)    | 126 (112; 141)    | <0.001   |

Data are given as number (percentage) or median (25<sup>th</sup> and 75<sup>th</sup> percentile). \*p-values are from  $\chi^2$  test or Kruskal Wallis test

CKD G1: eGFR $\geq$ 90 ml/min/1.73 m<sup>2</sup>, CKD G2: eGFR 60-89 ml/min/1.73 m<sup>2</sup>; CKD G3: eGFR 30-59 ml/min/1.73 m<sup>2</sup>

**Supplemental Table S4.** Association between risk factors and kidney volume in women (n=930) and men (n=885).

|                           | Right kidney         |         | Left kidney          |         |
|---------------------------|----------------------|---------|----------------------|---------|
|                           | volume               |         | volume               |         |
|                           | $\beta$ (95%CI)      | p-value | $\beta$ (95%CI)      | p-value |
| <b>WOMEN</b>              |                      |         |                      |         |
| Age                       | -0.06 (-0.2; 0.07)   | 0.358   | -0.16 (-0.31; 0)     | 0.044   |
| Smoking status            |                      |         |                      |         |
| Never smoker              | Ref                  |         | Ref                  |         |
| Ex-smoker                 | 0.44 (-2.65; 3.52)   | 0.781   | -0.51 (-4; 2.97)     | 0.773   |
| Current smoker            | 11.8 (8.3; 15.4)     | <0.001  | 14.0 (9.98; 18.0)    | <0.001  |
| Body surface area         | 81.8 (72.6; 90.9)    | <0.001  | 87.7 (77.3; 98.1)    | <0.001  |
| Systolic BP               | -0.02 (-0.15; 0.1)   | 0.705   | -0.03 (-0.17; 0.11)  | 0.666   |
| Diastolic BP              | 0.16 (-0.05; 0.38)   | 0.103   | 0.17 (-0.07; 0.41)   | 0.166   |
| Diabetes mellitus (Typ-2) | 3.07 (-2.77; 8.92)   | 0.303   | 3.34 (-3.25; 9.94)   | 0.32    |
| HDL-C                     | -6.4 (-10.5; -2.35)  | 0.002   | -5.38 (-9.95; -0.8)  | 0.021   |
| LDL-C                     | -0.09 (-1.61; 1.43)  | 0.911   | -0.26 (-1.98; 1.45)  | 0.762   |
| eGFR                      | 0.49 (0.4; 0.58)     | <0.001  | 0.43 (0.33; 0.53)    | <0.001  |
| Uric acid                 | -0.03 (-0.06; -0.01) | 0.013   | -0.06 (-0.08; -0.03) | <0.001  |
| <b>MEN</b>                |                      |         |                      |         |
| Age                       | 0.25 (0.11; 0.39)    | 0.001   | 0.15 (0; 0.29)       | 0.054   |
| Smoking status            |                      |         |                      |         |
| Never smoker              | Ref                  |         | Ref                  |         |
| Ex-smoker                 | 3.08 (-0.79; 6.96)   | 0.119   | 3 (-1.12; 7.11)      | 0.154   |
| Current smoker            | 17.0 (12.5; 21.5)    | <0.001  | 16.8 (12.0; 21.5)    | <0.001  |
| Body surface area         | 114.7 (103.4; 125.9) | <0.001  | 114.8 (102.8; 126.7) | <0.001  |
| Systolic BP               | 0.08 (-0.07; 0.22)   | 0.313   | 0.05 (-0.11; 0.21)   | 0.558   |
| Diastolic BP              | 0.07 (-0.15; 0.3)    | 0.534   | 0.15 (-0.09; 0.39)   | 0.222   |
| Diabetes mellitus (Typ-2) | 7.19 (0.97; 13.42)   | 0.023   | 4.24 (-2.37; 10.85)  | 0.208   |
| HDL-C                     | -3.68 (-9.06; 1.71)  | 0.181   | -1.97 (-7.69; 3.76)  | 0.500   |
| LDL-C                     | 1.54 (-0.25; 3.33)   | 0.091   | 1.61 (-0.29; 3.51)   | 0.097   |
| eGFR                      | 0.67 (0.56; 0.79)    | <0.001  | 0.66 (0.54; 0.79)    | <0.001  |
| Uric acid                 | -0.02 (-0.05; 0)     | 0.102   | -0.03 (-0.05; 0)     | 0.051   |

$\beta$ -coefficients are from multivariable linear regression models.

**Supplemental Table S5.** Association between risk factors and kidney volume in healthy subjects (n=248)

| Risk factor                | Right kidney        |         | Left kidney          |         |
|----------------------------|---------------------|---------|----------------------|---------|
|                            | volume              |         | volume               |         |
|                            | $\beta$ (95%CI)     | p-value | $\beta$ (95%CI)      | p-value |
| Men                        | 5.92 (-3.08; 14.91) | 0.196   | 9.46 (-0.34; 19.3)   | 0.058   |
| Age                        | 0.12 (-0.11; 0.35)  | 0.303   | -0.03 (-0.28; 0.22)  | 0.804   |
| Smoking status             |                     |         |                      |         |
| Never smoker               | Ref                 |         | Ref                  |         |
| Ex-smoker                  | -0.01 (-5.43; 5.42) | 0.999   | -0.40 (-6.32; 5.51)  | 0.893   |
| Current smoker             | -                   |         | -                    |         |
| Body surface area          | 100.8 (81.4; 120.2) | <0.001  | 100.1 (79.0; 121.3)  | <0.001  |
| Systolic BP                | -0.09 (-0.46; 0.28) | 0.637   | -0.03 (-0.44; 0.37)  | 0.877   |
| Diastolic BP               | 0.32 (-0.20; 0.84)  | 0.223   | 0.36 (-0.20; 0.92)   | 0.206   |
| Diabetes mellitus (Typ-2)  | -                   |         |                      |         |
| HDL-C                      | -0.03 (-8.63; 8.58) | 0.995   | -3.00 (-12.4; 6.37)  | 0.529   |
| LDL-C                      | -6.00 (-13.1; 1.08) | 0.096   | -3.30 (-11.0; 4.41)  | 0.400   |
| Glomerular filtration rate | 0.45 (0.27; 0.63)   | <0.001  | 0.48 (0.28; 0.67)    | <0.001  |
| Uric acid                  | -0.04 (-0.10; 0.02) | 0.166   | -0.09 (-0.16; -0.03) | 0.005   |
| Albumin/Creatinin-Ratio    | 0.00 (-0.05; 0.05)  | 0.900   | 0.00 (-0.06; 0.06)   | 0.993   |

$\beta$ -coefficients are from linear regression

**Supplemental Table S6.** Association between risk factors and kidney volume in unhealthy subjects (n=1,553)

| Risk factor                | Right kidney         |         | Left kidney          |         |
|----------------------------|----------------------|---------|----------------------|---------|
|                            | volume               |         | volume               |         |
|                            | $\beta$ (95%CI)      | p-value | $\beta$ (95%CI)      | p-value |
| Men                        | 9.77 (6.45; 13.1)    | <0.001  | 9.52 (5.9; 13.13)    | <0.001  |
| Age                        | 0.09 (-0.02; 0.20)   | 0.097   | 0.01 (-0.11; 0.13)   | 0.896   |
| Smoking status             |                      |         |                      |         |
| Never smoker               | Ref                  |         | Ref                  |         |
| Ex-smoker                  | 2.62 (-0.11; 5.35)   | 0.060   | 2.42 (-0.56; 5.39)   | 0.111   |
| Current smoker             | 15.0 (11.8; 18.1)    | <0.001  | 16.6 (13.2; 20.0)    | <0.001  |
| Body surface area          | 98.0 (90.1; 106.0)   | <0.001  | 101.5 (92.8; 110.2)  | <0.001  |
| Systolic BP                | 0.01 (-0.09; 0.11)   | 0.888   | -0.02 (-0.13; 0.09)  | 0.705   |
| Diastolic BP               | 0.13 (-0.03; 0.30)   | 0.122   | 0.19 (0.01; 0.37)    | 0.037   |
| Diabetes mellitus (Typ-2)  | 5.33 (0.96; 9.71)    | 0.017   | 3.76 (-1.01; 8.54)   | 0.122   |
| HDL-C                      | -5.44 (-9.07; -1.80) | 0.003   | -3.34 (-7.31; 0.63)  | 0.099   |
| LDL-C                      | 0.67 (-0.62; 1.96)   | 0.311   | 0.56 (-0.85; 1.97)   | 0.437   |
| Glomerular filtration rate | 0.59 (0.51; 0.67)    | <0.001  | 0.55 (0.46; 0.63)    | <0.001  |
| Uric acid                  | -0.03 (-0.05; -0.01) | 0.002   | -0.04 (-0.06; -0.02) | <0.001  |
| Albumin/Creatinin-Ratio    | 0.01 (0.00; 0.02)    | 0.123   | 0.00 (-0.01; 0.01)   | 0.973   |

$\beta$ -coefficients are from linear regression
